# Supplementary material for: Large-Scale Plasma Peptidomic Profiling Reveals a Novel, Nontoxic, Crassostrea hongkongensis-Derived Antimicrobial Peptide against Foodborne Pathogens
Source: MDPI journal article supplement (doi:10.3390/md19080420), 2021-07-26
Supplement: s1 [file s1]

# Supplementary Information

## Large-scale plasma peptidomic profiling reveals a novel, nontoxic, *Crassostrea hongkongensis*-derived antimicrobial peptide against foodborne pathogens

Fan Mao <sup>1,2#</sup>, Yongbo Bao <sup>3#</sup>, Nai-Kei Wong <sup>1,4#</sup>, Minwei Huang <sup>1,2</sup>, Kunna Liu <sup>1,2</sup>, Xiangyu Zhang <sup>1,2</sup>, Zhuo Yang <sup>1,2</sup>, Wenjie Yi <sup>1,2</sup>, Xiao Shu <sup>1,2</sup>, Zhiming Xiang <sup>1,2</sup>, Yang Zhang <sup>1,2\*</sup>, Ziniu Yu <sup>1,2\*</sup>

<sup>1</sup> CAS Key Laboratory of Tropical Marine Bio-resources and Ecology and Guangdong Provincial Key Laboratory of Applied Marine Biology, South China Sea Institute of Oceanology, Innovation Academy of South China Sea Ecology and Environmental Engineering, Chinese Academy of Sciences, Guangzhou, China;

<sup>2</sup> Southern Marine Science and Engineering Guangdong Laboratory (Guangzhou), Guangzhou, China;

<sup>3</sup> Zhejiang Key Laboratory of Aquatic Germplasm Resources, College of Biological and Environmental Sciences, Zhejiang Wanli University, Ningbo, China;

<sup>4</sup> Department of Pharmacology, Shantou University Medical College, Shantou, China.

# These authors contributed equally to this work.

\* Correspondence: yzhang@scsio.ac.cn (Y. Zhang); carlzyu@scsio.ac.cn (Z. Yu); Tel.: +86 20 8910 2507

**Table S1. An overview of the peptide identification in each sample**

| Sample | Total_spectra | Identified_spectra | Identified_peptides(By MS/MS) |
|--------|---------------|--------------------|-------------------------------|
| P1_1   | 50970         | 1414               | 569                           |
| P1_2   | 51524         | 1331               | 560                           |
| P2_1   | 51742         | 2630               | 943                           |
| P2_2   | 52416         | 2004               | 743                           |
| p3_1   | 51826         | 2406               | 874                           |
| p3_2   | 51983         | 2234               | 823                           |
| P4_1   | 52397         | 6027               | 2353                          |
| P4_2   | 49110         | 4372               | 1770                          |
| P5_1   | 51974         | 4806               | 1858                          |
| P5_2   | 51553         | 4857               | 1850                          |
| P6_1   | 50869         | 3572               | 1172                          |
| p6_2   | 50846         | 3388               | 1112                          |

Each sample was divided into two copies as technical duplicates.

**Table S2. Physicochemical properties of up-regulated peptides (URPs).**

| Entry | Sequence                             | Hydrophobicity<br>(H) | Hydrophobic<br>moment (μH) | Charge |
|-------|--------------------------------------|-----------------------|----------------------------|--------|
| URP1  | RADISHLQDEVNL                        | 0.31909               | 0.27154                    | -3     |
| URP2  | VDEATYRADISHLQDEVNL                  | 0.16278               | 0.17122                    | -4     |
| URP3  | FPVDEATYRADISHLQDEVNL                | 0.24111               | 0.17949                    | -4     |
| URP4  | QEMYNGIKEIIQAEKNAK                   | 0.09333               | 0.39073                    | 0      |
| URP5  | AEWVSTTGRSIPDNAIR                    | 0.39727               | 0.50809                    | 0      |
| URP6  | LTIGHRDGILGRSL                       | 0.51                  | 0.16236                    | 0      |
| URP7  | PIKAGDKLPVAVDL                       | 0.36636               | 0.36294                    | 1      |
| URP8  | DECIGKPNGVYEVGCRS                    | 0.27188               | 0.40384                    | -1     |
| URP9  | SEGQIVPIALRRF                        | 0.38583               | 0.13305                    | 1      |
| URP10 | ATKVAPELLKDVCAEH                     | 0.33687               | 0.39616                    | -1     |
| URP11 | ATKVAPELLKD                          | 0.25727               | 0.49259                    | 0      |
| URP12 | WLTIGHRDGILGRSL                      | 0.48643               | 0.07998                    | 1      |
| URP13 | ATKVAPELL                            | n.d                   | n.d                        | n.d    |
| URP14 | AILQGDHTTHTAIAC                      | 0.60125               | 0.17835                    | -1     |
| URP15 | VDPQTICTQL                           | 0.629                 | 0.39004                    | -1     |
| URP16 | AVFNPCGSSYWEAVGHYDPDHHT<br>TEKNPFALA | 0.35467               | 0.22643                    | -3     |
| URP17 | AEAEDKPTVEEDQHEDDPNYRAP<br>AQK       | -0.134                | 0.04038                    | -7     |
| URP18 | AILQGDHTGHSIIAC                      | 0.56625               | 0.1836                     | -1     |
| URP19 | AINRTTTPDAHTLKIS                     | 0.38375               | 0.34684                    | 1      |
| URP20 | MDAIKKKMLAMK                         | 0.25667               | 0.35541                    | 3      |
| URP21 | AVDTPSATTNPKRDVNINVRMFL<br>V         | 0.3244                | 0.20027                    | 1      |
| URP22 | SATTTNPKRDVNINVRMFLV                 | 0.3185                | 0.14878                    | 2      |

|       |                                |         |         |    |
|-------|--------------------------------|---------|---------|----|
| URP23 | ASTRNEANVNIYLHL                | 0.22857 | 0.06669 | 0  |
| URP24 | STARNEANVNIYLHL                | 0.22857 | 0.08483 | 0  |
| URP25 | TIGHRDGVLGRSL                  | 0.21091 | 0.26331 | 1  |
| URP26 | VILQSDHNHPGSEQIACCIIGRAQA<br>H | 0.454   | 0.03146 | -1 |
| URP27 | DDSPCWRLNGRCQWTSEPCGQ          | 0.371   | 0.13501 | -1 |
| URP28 | FPVDEATYRADISHLQD              | 0.35938 | 0.14399 | -2 |
| URP29 | VVKEGQDSELETLQ                 | 0.27571 | 0.31248 | -3 |
| URP30 | ATKVAPELLKDVC                  | 0.3375  | 0.54883 | 0  |
| URP31 | ATTTNPKRDVNINVRMFLV            | 0.28833 | 0.23193 | 2  |
| URP32 | PVSKVFARQIF                    | 0.59909 | 0.39078 | 2  |
| URP33 | TNPKRDVNINVRMFLV               | 0.34875 | 0.17942 | 2  |
| URP34 | TPSATTTNPKRDVNINVRMFLV         | 0.33409 | 0.16843 | 2  |
| URP35 | IDNFRPVQPL                     | 0.535   | 0.75045 | 0  |

n.d, not determined.

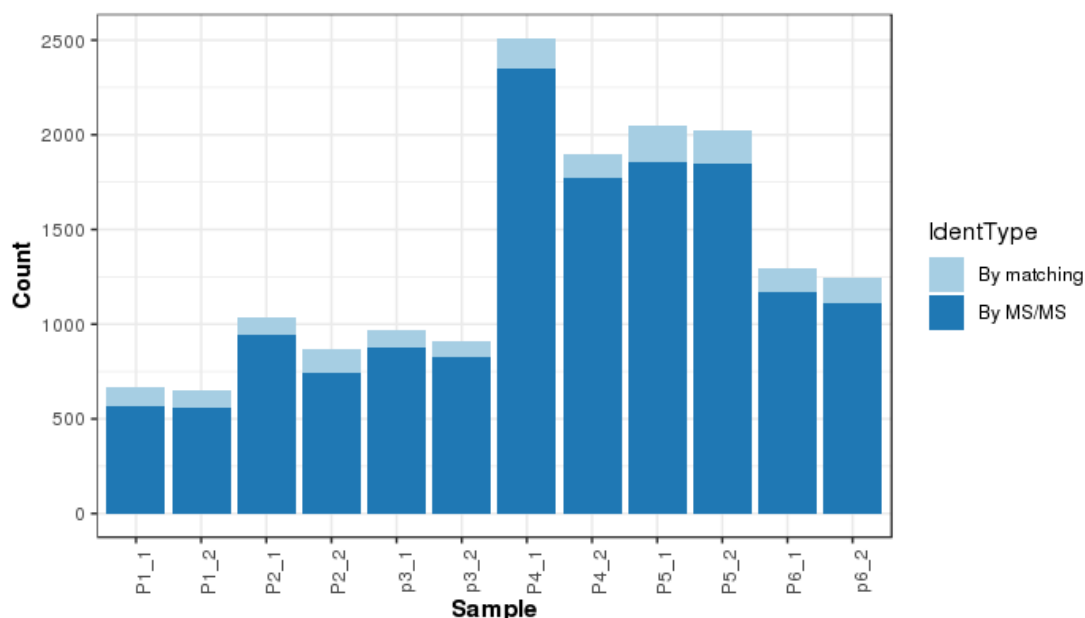

**Fig. S1 Abundances of identified peptides in each sample.** The horizontal axis shows the length interval of different polypeptides (amino acid residues), and the vertical axis the number of polypeptides in the corresponding interval. “By MS/MS” is the reliable identification result obtained by MaxQuant through secondary spectrum matching. “By matching” is authentication evidence obtained by MaxQuant through the "Match Between runs" algorithm.
